# Supplementary material for: High resolution temporal transcriptomics of mouse embryoid body development reveals complex expression dynamics of coding and noncoding loci
Source: PubMed Central journal article supplement (PMC5532269; doi:10.1038/s41598-017-06110-5), 2017-07-27
Supplement: 41598_2017_6110_MOESM1_ESM.pdf [file 41598_2017_6110_MOESM1_ESM.pdf]

**Supplementary Figures and Tables for “High resolution temporal transcriptomics of mouse embryoid body development reveals complex expression dynamics of coding and noncoding loci”**

Brian S. Gloss<sup>1,2</sup>, Bethany Signal<sup>1,2</sup>, Seth W. Cheetham<sup>3</sup>, Franziska Gruhl<sup>4</sup>, Dominik Kaczorowski<sup>1</sup>, Andrew C. Perkins<sup>5</sup>, Marcel E. Dinger<sup>1,2,\*</sup>

<sup>1</sup> Garvan Institute of Medical Research, Sydney, Australia

<sup>2</sup> St Vincents Clinical School, Faculty of Medicine, UNSW Australia, Sydney, Australia

<sup>3</sup> The Gurdon Institute and Department of Physiology, Development, and Neuroscience, University of Cambridge, Cambridge, United Kingdom

<sup>4</sup> Center for Integrative Genomics, University of Lausanne, Lausanne, Switzerland

<sup>5</sup> Mater-UQ Research Institute, The University of Queensland, Translational Research Institute, Brisbane, Australia

\* Corresponding Author: Marcel E. Dinger; tel: +61 2 9355 5860; fax: +61 2 9295 8101, [email: m.dinger@garvan.org.au](mailto:m.dinger@garvan.org.au)

## Supplementary Tables

Supplementary Table S1: Counts of Genes by biotype

| <b>Biotype</b>                     | <b>6 hourly</b> | <b>24 hourly</b> | <b>% increase w 6 hourly</b> | <b>Designation</b> |
|------------------------------------|-----------------|------------------|------------------------------|--------------------|
| antisense                          | 148             | 126              | 17.5%                        | noncoding_lincRNA  |
| lincRNA                            | 265             | 235              | 12.8%                        | noncoding_lincRNA  |
| processed_transcript               | 175             | 159              | 10.1%                        | noncoding_lincRNA  |
| miRNA                              | 17              | 14               | 21.4%                        | noncoding_other    |
| misc_RNA                           | 3               | 3                | 0.0%                         | noncoding_other    |
| Mt_rRNA                            | 2               | 2                | 0.0%                         | noncoding_other    |
| Mt_tRNA                            | 3               | 3                | 0.0%                         | noncoding_other    |
| polymorphic_pseudogene             | 5               | 4                | 25.0%                        | noncoding_other    |
| pseudogene                         | 292             | 257              | 13.6%                        | noncoding_other    |
| sense_intronic                     | 7               | 7                | 0.0%                         | noncoding_other    |
| sense_overlapping                  | 2               | 2                | 0.0%                         | noncoding_other    |
| snoRNA                             | 40              | 30               | 33.3%                        | noncoding_other    |
| snRNA                              | 1               | 1                | 0.0%                         | noncoding_other    |
| protein_coding                     | 13336           | 13036            | 2.3%                         | protein_coding     |
| <b>Total</b>                       | <b>14296</b>    | <b>13879</b>     |                              |                    |
| <i>Novel_MultiExonic_assembled</i> | <i>1851</i>     | <i>1174</i>      | <i>57.7%</i>                 | <i>Novel</i>       |

Supplementary Table S2: Periodic Genes

| GENCODE_ID            | Period      | Chr,  | Start     | End       | Strand | Gene Type      | Gene Symbol   | sRNA  |
|-----------------------|-------------|-------|-----------|-----------|--------|----------------|---------------|-------|
| ENSMUSG0000000826.10  | 17.28571429 | chr2  | 181520485 | 181555133 | +      | protein_coding | Dnajc5        | TRUE  |
| ENSMUSG00000003847.10 | 24.2        | chr8  | 107293470 | 107379517 | +      | protein_coding | Nfat5         | FALSE |
| ENSMUSG00000004187.10 | 20.16666667 | chr15 | 76660641  | 76668196  | +      | protein_coding | Kifc2         | FALSE |
| ENSMUSG00000005615.8  | 20.16666667 | chr16 | 32430921  | 32475070  | +      | protein_coding | Pcyt1a        | FALSE |
| ENSMUSG00000005682.8  | 24.2        | chr10 | 128303335 | 128321358 | +      | protein_coding | Pan2          | FALSE |
| ENSMUSG00000006463.7  | 24.2        | chr19 | 4878668   | 4885397   | +      | protein_coding | Zdhhc24       | FALSE |
| ENSMUSG00000008200.8  | 24.2        | chr2  | 90745370  | 90781021  | +      | protein_coding | Fnbp4         | FALSE |
| ENSMUSG00000009079.10 | 24.2        | chr11 | 5069689   | 5099266   | -      | protein_coding | Ewsr1         | TRUE  |
| ENSMUSG00000013483.8  | 24.2        | chr11 | 119307768 | 119345375 | +      | protein_coding | Card14        | FALSE |
| ENSMUSG00000016427.7  | 30.25       | chrX  | 37187588  | 37191163  | -      | protein_coding | Ndufa1        | FALSE |
| ENSMUSG00000017188.3  | 24.2        | chr11 | 101277968 | 101279114 | -      | protein_coding | Coa3          | FALSE |
| ENSMUSG00000018923.7  | 24.2        | chr11 | 70451919  | 70453727  | +      | protein_coding | Med11         | FALSE |
| ENSMUSG00000019066.7  | 17.28571429 | chr9  | 21907491  | 21918192  | -      | protein_coding | Rab3d         | FALSE |
| ENSMUSG00000020167.8  | 20.16666667 | chr10 | 80409514  | 80433647  | -      | protein_coding | Tcf3          | FALSE |
| ENSMUSG00000020530.8  | 20.16666667 | chr11 | 84832361  | 84870817  | -      | protein_coding | Ggnbp2        | TRUE  |
| ENSMUSG00000020843.9  | 24.2        | chr11 | 76406952  | 76416292  | +      | protein_coding | Timm22        | FALSE |
| ENSMUSG00000020894.10 | 24.2        | chr11 | 69088490  | 69092384  | +      | protein_coding | Vamp2         | FALSE |
| ENSMUSG00000021124.7  | 24.2        | chr12 | 79156017  | 79172667  | -      | protein_coding | Vti1b         | FALSE |
| ENSMUSG00000022805.10 | 17.28571429 | chr16 | 38297754  | 38342143  | -      | protein_coding | Maats1        | FALSE |
| ENSMUSG00000024293.9  | 15.125      | chr18 | 10566602  | 10610352  | -      | protein_coding | Esco1         | FALSE |
| ENSMUSG00000024959.7  | 24.2        | chr19 | 6941861   | 6951898   | +      | protein_coding | Bad           | FALSE |
| ENSMUSG00000025486.10 | 30.25       | chr7  | 140863670 | 140882309 | -      | protein_coding | Sirt3         | FALSE |
| ENSMUSG00000025489.4  | 20.16666667 | chr7  | 140948963 | 140950239 | -      | protein_coding | Ifitm5        | FALSE |
| ENSMUSG00000025500.5  | 20.16666667 | chr7  | 141210043 | 141214082 | -      | protein_coding | 1600016N20Rik | FALSE |
| ENSMUSG00000025868.6  | 30.25       | chr13 | 54590207  | 54591158  | +      | protein_coding | Higd2a        | FALSE |
| ENSMUSG00000026034.11 | 24.2        | chr1  | 58410189  | 58424066  | -      | protein_coding | Clk1          | TRUE  |
| ENSMUSG00000026181.11 | 17.28571429 | chr16 | 16896469  | 16927364  | +      | protein_coding | Ppm1f         | FALSE |
| ENSMUSG00000026199.11 | 20.16666667 | chr1  | 75192151  | 75199387  | +      | protein_coding | Ankzf1        | FALSE |

|                       |             |       |           |           |   |                |         |       |
|-----------------------|-------------|-------|-----------|-----------|---|----------------|---------|-------|
| ENSMUSG00000026648.12 | 24.2        | chr2  | 3424131   | 3464130   | + | protein_coding | Dclre1c | FALSE |
| ENSMUSG00000026792.10 | 20.16666667 | chr2  | 32925216  | 32961614  | - | protein_coding | Lrsam1  | FALSE |
| ENSMUSG00000026864.7  | 24.2        | chr2  | 34771970  | 34776531  | + | protein_coding | Hspa5   | FALSE |
| ENSMUSG00000026977.11 | 20.16666667 | chr2  | 60209887  | 60250676  | + | protein_coding | March7  | FALSE |
| ENSMUSG00000027170.6  | 24.2        | chr2  | 104999656 | 105017080 | - | protein_coding | Eif3m   | FALSE |
| ENSMUSG00000027245.5  | 24.2        | chr2  | 121453290 | 121458672 | + | protein_coding | Hypk    | FALSE |
| ENSMUSG00000027520.9  | 20.16666667 | chr1  | 63273265  | 63314576  | + | protein_coding | Zdbf2   | FALSE |
| ENSMUSG00000027708.8  | 30.25       | chr3  | 35892105  | 35937445  | - | protein_coding | Dcun1d1 | FALSE |
| ENSMUSG00000027782.4  | 20.16666667 | chr3  | 69067149  | 69127113  | - | protein_coding | Kpna4   | FALSE |
| ENSMUSG00000027939.7  | 24.2        | chr3  | 90104132  | 90212017  | + | protein_coding | Nup210l | FALSE |
| ENSMUSG00000028053.7  | 24.2        | chr3  | 88965812  | 89079373  | + | protein_coding | Ash1l   | FALSE |
| ENSMUSG00000028062.9  | 30.25       | chr3  | 88549819  | 88553074  | - | protein_coding | Lamtor2 | FALSE |
| ENSMUSG00000028790.7  | 30.25       | chr4  | 129703164 | 129742303 | - | protein_coding | Khdrbs1 | FALSE |
| ENSMUSG00000028979.11 | 24.2        | chr4  | 148602554 | 148615499 | + | protein_coding | Masp2   | FALSE |
| ENSMUSG00000028999.9  | 15.125      | chr5  | 23787711  | 23820369  | + | protein_coding | Rint1   | FALSE |
| ENSMUSG00000029068.10 | 24.2        | chr4  | 155812489 | 155824543 | + | protein_coding | Ccnl2   | FALSE |
| ENSMUSG00000029238.8  | 24.2        | chr5  | 76212177  | 76304548  | - | protein_coding | Clock   | FALSE |
| ENSMUSG00000030752.2  | 20.16666667 | chr7  | 125444676 | 125462265 | + | protein_coding | Kdm8    | FALSE |
| ENSMUSG00000031167.10 | 24.2        | chrX  | 8138975   | 8145880   | - | protein_coding | Rbm3    | FALSE |
| ENSMUSG00000031380.10 | 24.2        | chrX  | 164373378 | 164402650 | + | protein_coding | Figf    | FALSE |
| ENSMUSG00000031422.10 | 24.2        | chrX  | 136732942 | 136743690 | - | protein_coding | Morf4l2 | FALSE |
| ENSMUSG00000031433.9  | 30.25       | chrX  | 139889511 | 139998595 | - | protein_coding | Rbm41   | FALSE |
| ENSMUSG00000032350.8  | 24.2        | chr9  | 77754535  | 77794485  | + | protein_coding | Gclc    | TRUE  |
| ENSMUSG00000033405.3  | 20.16666667 | chr14 | 73519864  | 73548242  | - | protein_coding | Nudt15  | TRUE  |
| ENSMUSG00000033439.6  | 24.2        | chr3  | 116581093 | 116614587 | - | protein_coding | Trmt13  | FALSE |
| ENSMUSG00000034799.10 | 24.2        | chr8  | 71624417  | 71671757  | - | protein_coding | Unc13a  | FALSE |
| ENSMUSG00000035458.8  | 20.16666667 | chr7  | 4518305   | 4524229   | - | protein_coding | Tnni3   | FALSE |
| ENSMUSG00000035476.3  | 20.16666667 | chrX  | 85574022  | 85634469  | + | protein_coding | Tab3    | FALSE |
| ENSMUSG00000035545.7  | 24.2        | chr7  | 4137039   | 4148173   | + | protein_coding | Leng8   | FALSE |
| ENSMUSG00000035637.8  | 24.2        | chr4  | 44981395  | 44990734  | + | protein_coding | Grhpr   | FALSE |
| ENSMUSG00000035666.8  | 20.16666667 | chr2  | 28822299  | 28840360  | - | protein_coding | Gtf3c4  | TRUE  |

|                       |             |       |           |           |   |                |               |       |
|-----------------------|-------------|-------|-----------|-----------|---|----------------|---------------|-------|
| ENSMUSG00000035885.4  | 30.25       | chr19 | 7215158   | 7217616   | - | protein_coding | Cox8a         | FALSE |
| ENSMUSG00000036864.8  | 20.16666667 | chr7  | 30539134  | 30552296  | - | protein_coding | BC053749      | FALSE |
| ENSMUSG00000037349.3  | 20.16666667 | chr19 | 6993018   | 6996117   | - | protein_coding | Nudt22        | FALSE |
| ENSMUSG00000037434.7  | 20.16666667 | chr1  | 191906767 | 191913247 | + | protein_coding | Slc30a1       | TRUE  |
| ENSMUSG00000037627.9  | 24.2        | chr15 | 36009479  | 36140400  | - | protein_coding | Rgs22         | FALSE |
| ENSMUSG00000038605.11 | 20.16666667 | chr2  | 181595218 | 181599212 | - | protein_coding | Samd10        | FALSE |
| ENSMUSG00000038705.7  | 24.2        | chr2  | 181251449 | 181288035 | - | protein_coding | Gmeb2         | FALSE |
| ENSMUSG00000039463.8  | 24.2        | chr2  | 167421712 | 167477000 | + | protein_coding | Slc9a8        | FALSE |
| ENSMUSG00000039485.6  | 30.25       | chr10 | 34297421  | 34301308  | + | protein_coding | Tspyl4        | FALSE |
| ENSMUSG00000039648.8  | 20.16666667 | chr2  | 30185124  | 30205847  | - | protein_coding | Ccbl1         | FALSE |
| ENSMUSG00000039781.8  | 20.16666667 | chr11 | 120064430 | 120086827 | - | protein_coding | Azi1          | FALSE |
| ENSMUSG00000040429.5  | 24.2        | chr5  | 3890581   | 3893933   | - | protein_coding | Mterf         | FALSE |
| ENSMUSG00000043243.9  | 24.2        | chr8  | 71597648  | 71607936  | + | protein_coding | Fam129c       | TRUE  |
| ENSMUSG00000044313.7  | 30.25       | chr3  | 101813076 | 101848959 | - | protein_coding | Mab2113       | FALSE |
| ENSMUSG00000044966.4  | 30.25       | chr11 | 16951375  | 16954772  | + | protein_coding | Fbxo48        | FALSE |
| ENSMUSG00000046909.9  | 30.25       | chr11 | 80136678  | 80142175  | - | protein_coding | Tefm          | FALSE |
| ENSMUSG00000047182.5  | 20.16666667 | chr5  | 137643032 | 137645714 | - | protein_coding | Irs3          | FALSE |
| ENSMUSG00000047909.5  | 24.2        | chr2  | 11777876  | 11790325  | + | protein_coding | Ankrd16       | FALSE |
| ENSMUSG00000048106.4  | 15.125      | chr3  | 19894886  | 19895962  | + | protein_coding | 4632415L05Rik | FALSE |
| ENSMUSG00000049164.6  | 20.16666667 | chr19 | 40894705  | 40917947  | + | protein_coding | Zfp518a       | TRUE  |
| ENSMUSG00000049470.7  | 20.16666667 | chr11 | 53350833  | 53421830  | + | protein_coding | Aff4          | FALSE |
| ENSMUSG00000050088.9  | 20.16666667 | chr17 | 14943184  | 14959570  | + | protein_coding | 1600012H06Rik | FALSE |
| ENSMUSG00000050357.8  | 24.2        | chr8  | 105690906 | 105698178 | + | protein_coding | Rltpr         | FALSE |
| ENSMUSG00000050856.10 | 30.25       | chr5  | 108433244 | 108434448 | - | protein_coding | Atp5k         | FALSE |
| ENSMUSG00000051278.8  | 24.2        | chr3  | 127553489 | 127618021 | + | protein_coding | 4930422G04Rik | FALSE |
| ENSMUSG00000053964.10 | 24.2        | chr7  | 28833975  | 28841703  | + | protein_coding | Lgals4        | FALSE |
| ENSMUSG00000054051.6  | 24.2        | chr14 | 32513521  | 32580989  | + | protein_coding | Ercc6         | FALSE |
| ENSMUSG00000054099.5  | 24.2        | chr5  | 8422850   | 8454790   | + | protein_coding | Slc25a40      | TRUE  |
| ENSMUSG00000055833.8  | 15.125      | chr1  | 191890233 | 191907527 | - | protein_coding | 1700034H15Rik | FALSE |
| ENSMUSG00000057262.1  | 24.2        | chr15 | 52477614  | 52478228  | - | protein_coding | Gm10020       | FALSE |
| ENSMUSG00000060032.4  | 30.25       | chr6  | 136808248 | 136810074 | + | protein_coding | H2afj         | TRUE  |

|                      |             |       |           |           |   |                      |               |       |
|----------------------|-------------|-------|-----------|-----------|---|----------------------|---------------|-------|
| ENSMUSG00000063108.8 | 20.16666667 | chr9  | 20432972  | 20460162  | - | protein_coding       | Zfp26         | FALSE |
| ENSMUSG00000066057.6 | 24.2        | chr17 | 94759944  | 94834799  | - | lincRNA              | Gm1976        | FALSE |
| ENSMUSG00000067833.2 | 30.25       | chr2  | 156392491 | 156392829 | - | protein_coding       | 2900097C17Rik | FALSE |
| ENSMUSG00000068221.4 | 20.16666667 | chr15 | 78913919  | 78919517  | + | protein_coding       | Pdpx          | FALSE |
| ENSMUSG00000068917.6 | 20.16666667 | chr3  | 89164795  | 89176921  | + | protein_coding       | Clk2          | TRUE  |
| ENSMUSG00000069890.3 | 24.2        | chr11 | 49586641  | 49588462  | - | pseudogene           | 1700024J04Rik | FALSE |
| ENSMUSG00000070282.6 | 30.25       | chr9  | 109827943 | 109832706 | - | pseudogene           | 3000002C10Rik | FALSE |
| ENSMUSG00000070343.2 | 24.2        | chr3  | 146838775 | 146839365 | - | protein_coding       | Gm10288       | FALSE |
| ENSMUSG00000070490.4 | 30.25       | chr3  | 52612835  | 52613836  | + | pseudogene           | Gm10293       | FALSE |
| ENSMUSG00000070808.3 | 20.16666667 | chr7  | 15971262  | 15999495  | - | protein_coding       | Gltscr1       | FALSE |
| ENSMUSG00000071037.5 | 17.28571429 | chr17 | 85090726  | 85458139  | + | protein_coding       | Camkmt        | FALSE |
| ENSMUSG00000071528.3 | 24.2        | chr19 | 47083471  | 47090625  | - | protein_coding       | Usmg5         | FALSE |
| ENSMUSG00000071632.4 | 20.16666667 | chr16 | 18836578  | 18840158  | + | protein_coding       | 2510002D24Rik | FALSE |
| ENSMUSG00000071796.7 | 24.2        | chr8  | 20262613  | 20297546  | - | pseudogene           | 6820431F20Rik | FALSE |
| ENSMUSG00000072294.4 | 24.2        | chr14 | 99874486  | 100149764 | - | protein_coding       | Klf12         | FALSE |
| ENSMUSG00000072762.3 | 20.16666667 | chr5  | 109735990 | 109751886 | - | protein_coding       | 4930522L14Rik | FALSE |
| ENSMUSG00000074925.3 | 20.16666667 | chr19 | 23687400  | 23721129  | + | protein_coding       | Ptar1         | FALSE |
| ENSMUSG00000075376.4 | 17.28571429 | chr2  | 37370069  | 37422903  | - | protein_coding       | Rc3h2         | FALSE |
| ENSMUSG00000075463.3 | 24.2        | chr14 | 122913030 | 122937469 | + | processed_transcript | 4930594M22Rik | FALSE |
| ENSMUSG00000078162.4 | 17.28571429 | chr3  | 142962561 | 142963792 | + | pseudogene           | Gm2574        | FALSE |
| ENSMUSG00000078619.4 | 17.28571429 | chr11 | 106263179 | 106272972 | - | protein_coding       | Smarcd2       | TRUE  |
| ENSMUSG00000078651.2 | 24.2        | chr11 | 101325063 | 101329702 | + | protein_coding       | Aoc2          | FALSE |
| ENSMUSG00000078919.4 | 24.2        | chr2  | 168209048 | 168230591 | - | protein_coding       | Dpm1          | FALSE |
| ENSMUSG00000079065.2 | 24.2        | chr5  | 104508352 | 104522383 | + | protein_coding       | BC005561      | FALSE |
| ENSMUSG00000079509.4 | 20.16666667 | chrX  | 94074631  | 94123702  | - | protein_coding       | Zfx           | TRUE  |
| ENSMUSG00000080727.2 | 20.16666667 | chr3  | 95871522  | 95889093  | + | protein_coding       | C920021L13Rik | FALSE |
| ENSMUSG00000081739.3 | 24.2        | chrX  | 128261411 | 128267924 | + | pseudogene           | Mdm4-ps       | FALSE |
| ENSMUSG00000082016.2 | 17.28571429 | chr7  | 27468890  | 27470557  | - | pseudogene           | Pgam1-ps2     | FALSE |
| ENSMUSG00000083816.2 | 24.2        | chr4  | 132884545 | 132886626 | + | pseudogene           | Gm13033       | FALSE |
| ENSMUSG00000084846.1 | 24.2        | chr3  | 94994410  | 94997350  | - | processed_transcript | A730011C13Rik | FALSE |
| ENSMUSG00000084892.1 | 24.2        | chr2  | 30306067  | 30323986  | - | processed_transcript | Gm14471       | FALSE |

|                      |             |       |           |           |   |                      |               |       |
|----------------------|-------------|-------|-----------|-----------|---|----------------------|---------------|-------|
| ENSMUSG00000084899.1 | 24.2        | chr10 | 86692119  | 86693095  | - | processed_transcript | Gm15344       | FALSE |
| ENSMUSG00000086904.1 | 24.2        | chr2  | 33978246  | 33980324  | + | lincRNA              | Gm13404       | TRUE  |
| ENSMUSG00000087060.1 | 24.2        | chr11 | 16935154  | 16951282  | - | processed_transcript | 2810442I21Rik | FALSE |
| ENSMUSG00000087153.1 | 24.2        | chr8  | 19682268  | 19698275  | + | protein_coding       | Gm6483        | FALSE |
| ENSMUSG00000087165.1 | 24.2        | chr11 | 57795499  | 57801417  | - | processed_transcript | 2010001A14Rik | FALSE |
| ENSMUSG00000087373.1 | 17.28571429 | chr11 | 88059066  | 88067476  | + | lincRNA              | Gm15892       | FALSE |
| ENSMUSG00000089788.1 | 24.2        | chr1  | 178321108 | 178324171 | - | processed_transcript | Gm16586       | TRUE  |
| ENSMUSG00000090086.1 | 24.2        | chr5  | 123133723 | 123141666 | - | lincRNA              | AI480526      | TRUE  |
| ENSMUSG00000090330.1 | 20.16666667 | chr7  | 25228687  | 25230257  | + | protein_coding       | 9130221H12Rik | FALSE |
| ENSMUSG00000090952.2 | 20.16666667 | chr17 | 33759992  | 33761870  | + | processed_transcript | Gm17251       | FALSE |
| ENSMUSG00000092275.1 | 24.2        | chr5  | 33293614  | 33311150  | - | lincRNA              | Gm20465       | TRUE  |
| ENSMUSG00000096401.1 | 24.2        | chr8  | 20136455  | 20150494  | + | protein_coding       | Gm21811       | FALSE |
| ENSMUSG00000097392.1 | 24.2        | chr5  | 104525735 | 104554211 | + | lincRNA              | D930016D06Rik | FALSE |
| ENSMUSG00000097743.1 | 20.16666667 | chr14 | 56696280  | 56701268  | - | lincRNA              | Gm16973       | TRUE  |
| ENSMUSG00000098161.1 | 24.2        | chr9  | 118404097 | 118406099 | - | lincRNA              | Gm26975       | FALSE |
| ENSMUSG00000098912.1 | 24.2        | chr3  | 88782943  | 88832547  | - | processed_transcript | RP23-199B2.4  | FALSE |

## Supplementary Figures and Legends

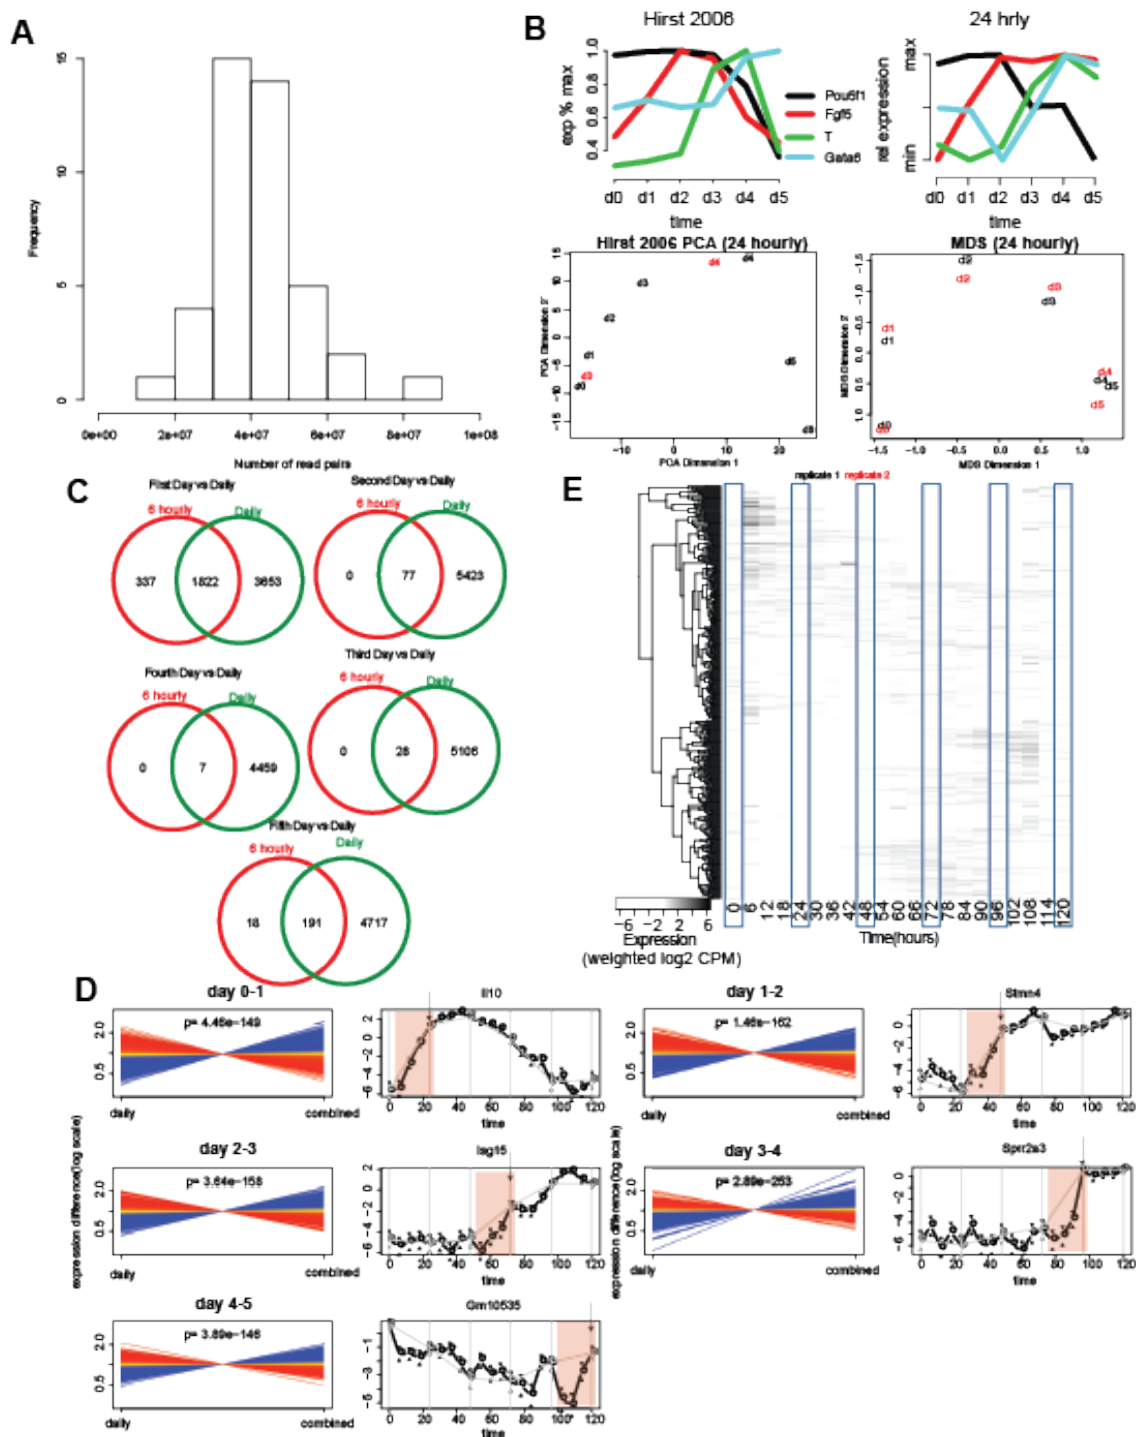

**Supplementary Figure S1: Global evaluation of high-resolution transcriptomic data.** (A) Histogram of mapped read number distribution per sample (pooled from biological replicates). (B) Comparison of expression levels and principle components analysis measured 24 hourly between this study and Hirst 2006 (C) Evidence of differential expression within one 24 hour period vs. any change across all 24hourly times ( $p < 0.0001$ ). (D) Comparing whether the 24 hourly measures “summarize” that 24 hour window by comparing mean expression for that window with the 24 hour time point, a colour gradient was assigned by ranked expression levels in the daily measure. P-value is from a paired Wilcoxon rank-sum test. (E) Greyscale heatmap of expression levels for genes only expressed outside of 24 hourly time points, clustered by expression pattern.



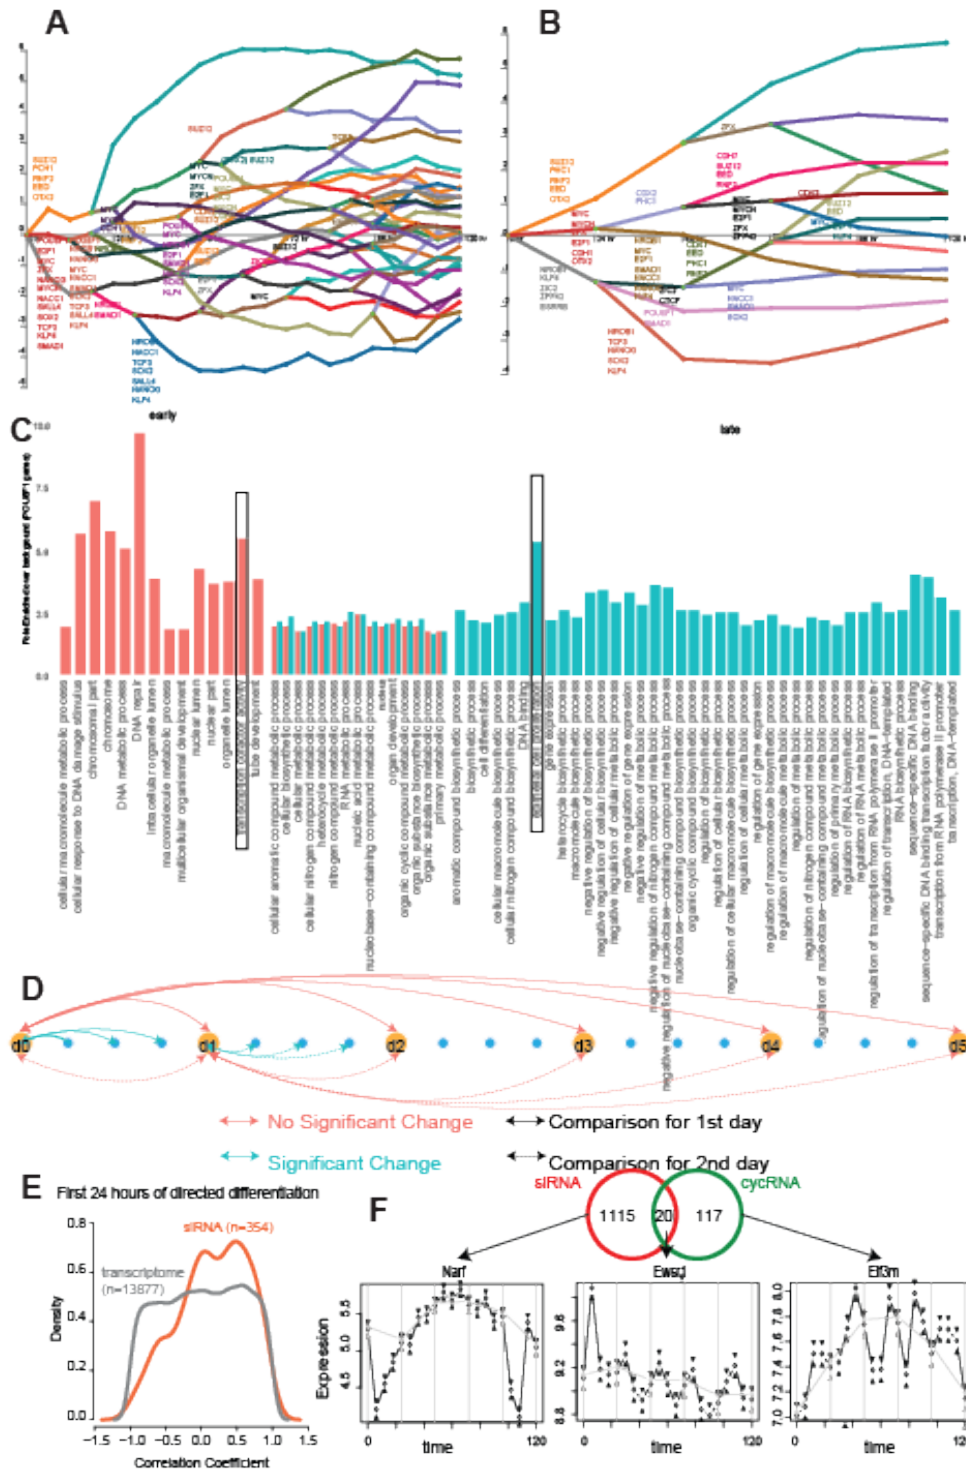

**Supplementary Figure S2: Highlighting unique knowledge gained from increased temporal resolution. (A & B)** Fully annotated DREM schematic of estimated TF activity of key ESC related TFs at 6hourly (A) vs. 24 hourly (B). Relative circle sizes are proportional to the spread of gene expression levels corresponding to that point. Line colors are assigned by branch and are not comparable between panels. Red and blue boxes pertain to branch points of interest (C) GO term enrichment (adjusted  $p < 0.05$ ) for genes corresponding branch points designated as early (co-observed with change in POU expression) and late (observed after POU5f1 Expression changes) highlighted by the blue boxes in Figure 2A. Black boxes represent similar terms identified in Figure 2D. (D) Schematic of differential expression analysis design used to identify siRNAs. (E) Correlation of siRNA expression in <sup>21</sup>. (F) Comparison of siRNAs and cycRNAs. Venn diagram of the overlap observed and examples from each class.

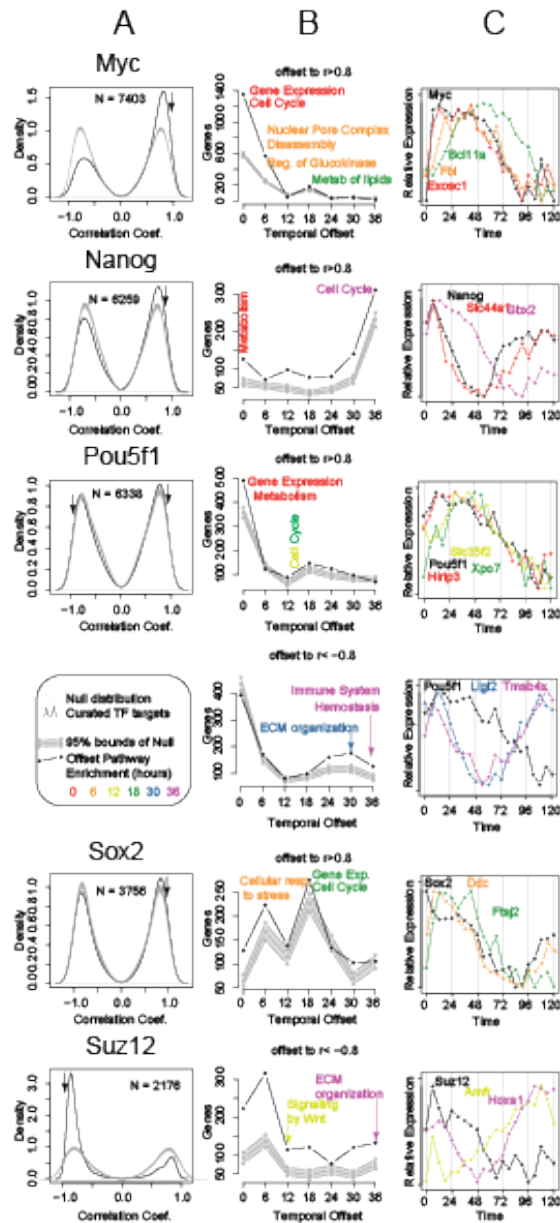

**Supplementary Figure S3: Temporal offsets in transcription factor (TF)- target gene expression.** (A) Curated TF/gene targets were downloaded from chea (<http://amp.pharm.mssm.edu/lib/chea.jsp>) for Myc, Nanog, Pou5f1, Sox2 and Suz12 (N=number of target genes). Expression of target genes were tested for correlation with their TF at different temporal offsets (0-36 hours) and compared to 500 random selections of the same number of genes (Null). Where absolute correlations of predicted targets exceeded the null distribution (arrow), (B) the number of genes achieving a maximal absolute correlation of  $>0.8$  and the offset required to reach these maxima was plotted against the 5th and 95th quantiles of the same results from the null distribution. Where the number of target genes exceeded the null distribution, the lists of genes in each offset were tested for enrichment of Reactome pathways relative to the total predicted target list (enrichment). (C) Example expression patterns of genes displaying these attributes were plotted.

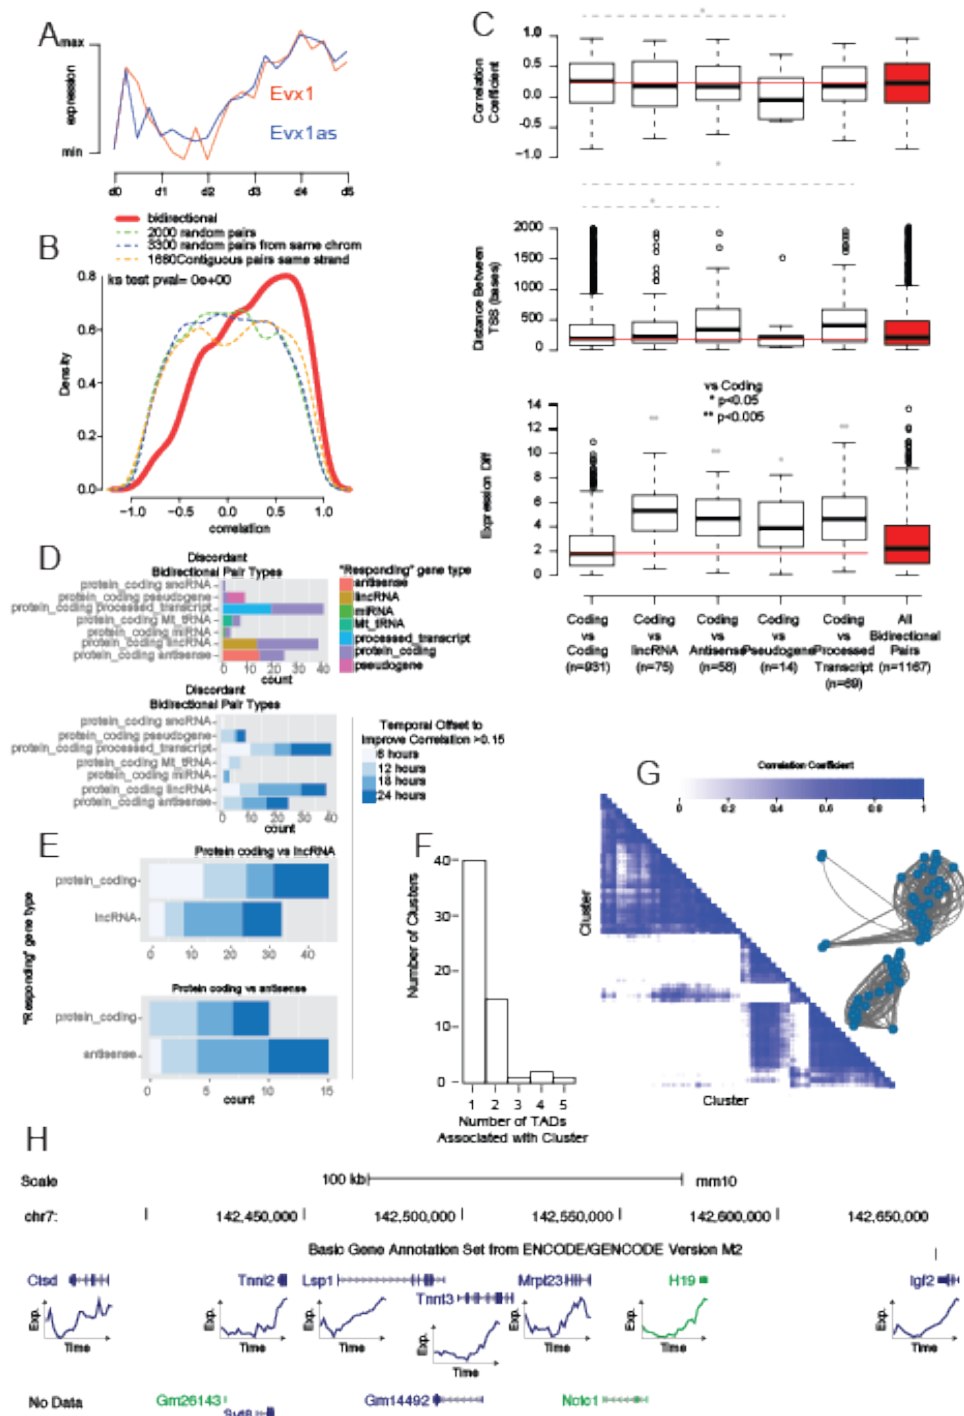

**Supplementary Figure S4: Bidirectional and co-expression analysis of mouse ES development.** (A) Expression profile of EVX1 and its antisense (and positively correlated) transcript EVX1AS- the peak at 6-18 hours has not been observed previously. (B) Distribution of correlation coefficients of bidirectional gene pairs (red) compared to similar numbers of randomly chosen genes pairs, randomly chosen genes from the same chromosome and, randomly selected neighbouring genes (dotted lines).  $ks$ =Kolmogorov-Smirnov test (bidirectional vs. random neighbouring gene pairs). (C) Characteristics of bidirectional gene pairs (Correlation coefficient, Distance between TSS and Difference of median expression (log scale) based on annotated gene-biotype (p value calculated using the Mann-Whitney test). (D) Counts of bidirectional gene pairs of differing biotypes achieving an improved correlation coefficient of  $>0.15$  (to at least 0.25) over that at time zero, colored by the biotype of the "following" gene or by the temporal offset required to achieve the improvement. (E) Comparison of responding gene biotype to the temporal offset for lincRNA and antisense biotypes. (F) Number of topological associated domains (TADs, HindIII data mapped to mm10 using liftOver from mm9) associated with each co-expressed gene cluster. (G) Clustering of co-regulated gene clusters visualized by network diagram and hierarchical clustering of the correlation matrix showing two distinct groups. (H) The imprinted H19/IGF2 cluster identified as a co-expressed gene cluster with gene expression data for measured genes. Some genes did not have expression data (no data).

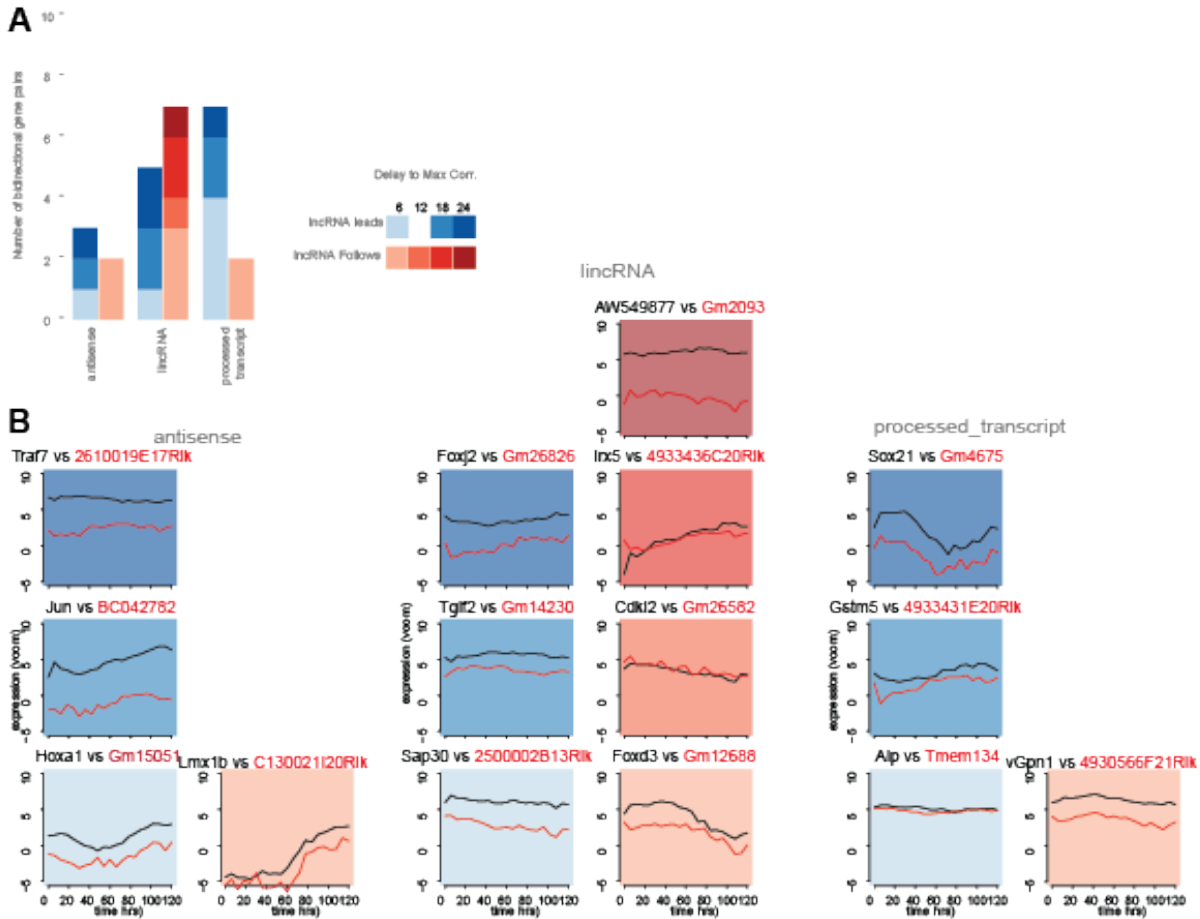

**Supplementary Figure S5: Temporal relationships of highly correlated coding-noncoding bidirectional pairs.** (A) Bar chart of the temporal offset required to reach a maximum correlation  $>0.8$  and whether the noncoding gene preceded the protein coding gene or vice versa. (B) Example gene expression profiles of bidirectional paired gene over the time course. Gene profiles are arranged and colored as the bar chart.

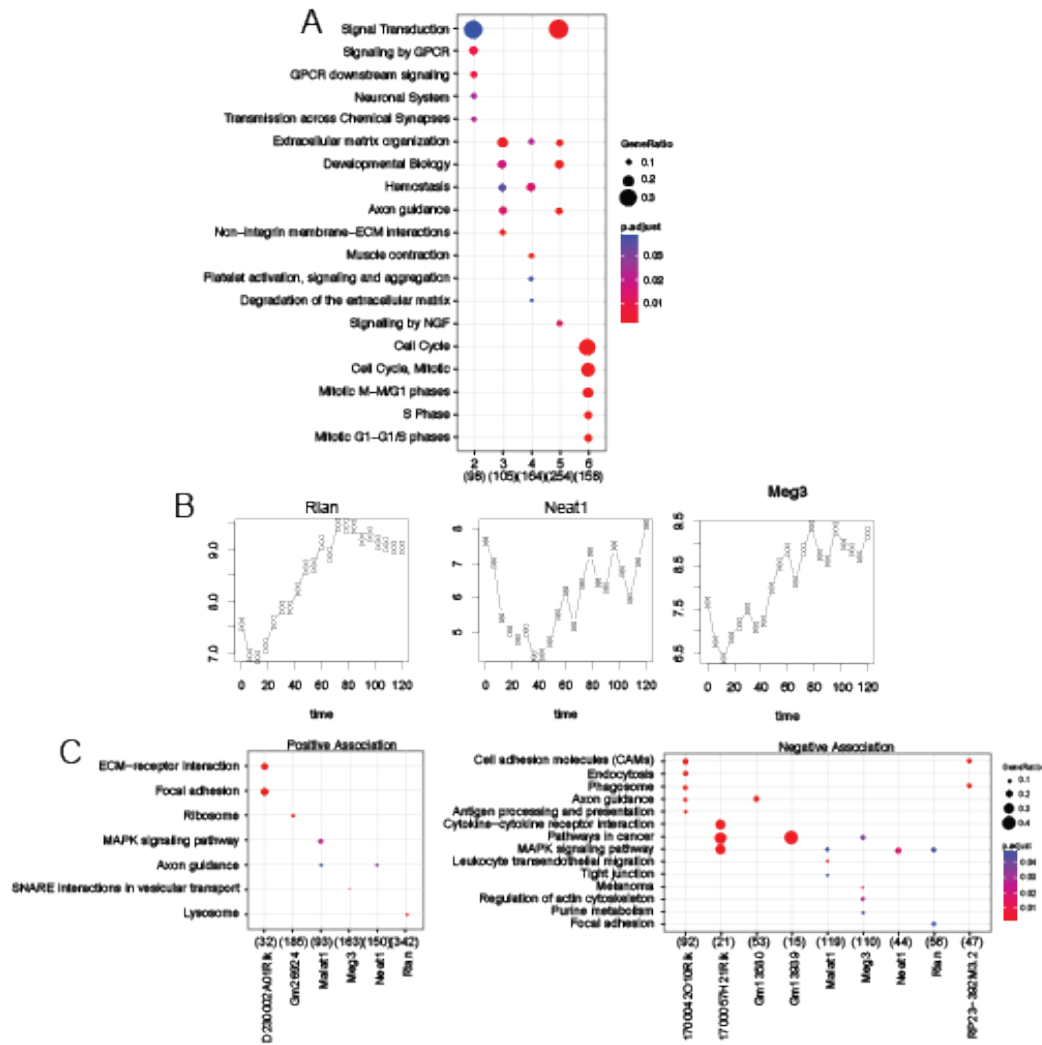

**Supplementary Figure S6: LncRNAs and their role in ES development. (A)** Reactome pathway enrichment for 5/6 k-means clusters of time-dependent protein coding genes. **(B)** Expression profiles for characterized lncRNAs described in text. **(C)** Reactome pathway enrichment for putative gene targets positively or negatively associated with candidate lncRNAs (top 4 pathways, enrichment adj. pval. <0.05)

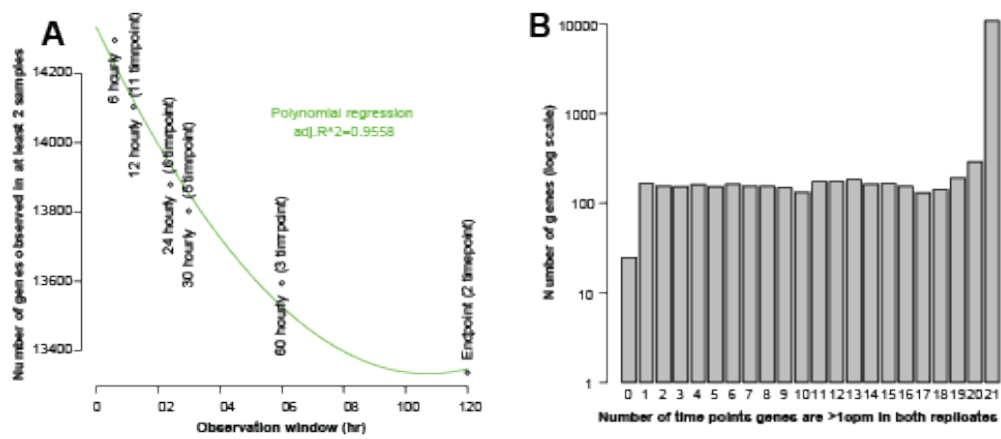

**Supplementary Figure S7: (A)** The impact of increasing temporal resolution on the number of genes observed to be expressed. **(B)** The number of conditions in which each gene observed is expressed above background in both replicates across the time course. ~150 new genes are observed at a single time point.
